# Supplementary material for: Genome-Wide Analysis of DoSPX Genes and the Function of DoSPX4 in Low Phosphorus Response in Dendrobium officinale
Source: Front Plant Sci. 2022 Jul 11;13:943788. doi: 10.3389/fpls.2022.943788 (PMC9313600; doi:10.3389/fpls.2022.943788)
Supplement: Supplementary file 2 [file Table_2.xlsx]

## Sheet: GENE NAME and ACCESSION NUMBER
TABLE S2: Gene name and accession numbers in this study.
Gene name	Accession	Species
AtSPX1	NP_197515	Arabidopsis thaliana
AtSPX2	NP_180234	Arabidopsis thaliana
AtSPX3	NP_182038	Arabidopsis thaliana
AtSPX4	NP_568312	Arabidopsis thaliana
AtSPX5	NP_001330175	Arabidopsis thaliana
AtSPX-MFS1	NP_001328313	Arabidopsis thaliana
AtSPX-MFS2	NP_001328779	Arabidopsis thaliana
AtSPX-MFS3	NP_192918	Arabidopsis thaliana
AtSPX-MFS4	NP_564807	Arabidopsis thaliana
AtSPX-MFS5	NP_001185297	Arabidopsis thaliana
AtSPX-RING1	NP_001324931	Arabidopsis thaliana
AtSPX-RING2	NP_001324933	Arabidopsis thaliana
AtSPX-RING3	NP_563667	Arabidopsis thaliana
AtSPX-RING4	NP_001321448	Arabidopsis thaliana
AtSPX-EXS1	NP_564940	Arabidopsis thaliana
AtSPX-EXS2	NP_001318190	Arabidopsis thaliana
AtSPX-EXS3	NP_001320956	Arabidopsis thaliana
AtSPX-EXS4	NP_001321974	Arabidopsis thaliana
AtSPX-EXS5	NP_001322237	Arabidopsis thaliana
AtSPX-EXS6	NP_001323487	Arabidopsis thaliana
AtSPX-EXS7	NP_001324493	Arabidopsis thaliana
AtSPX-EXS8	NP_172857	Arabidopsis thaliana
AtSPX-EXS9	NP_173995	Arabidopsis thaliana
AtSPX-EXS10	NP_178423	Arabidopsis thaliana
AtSPX-EXS11	NP_178425	Arabidopsis thaliana
AtSPX-EXS12	NP_189549	Arabidopsis thaliana
AtSPX-EXS13	NP_194265	Arabidopsis thaliana
PeSPX1	XP_020592653	Phalaenopsis equestris
PeSPX3	XP_020574285	Phalaenopsis equestris
PeSPX4	XP_020587946	Phalaenopsis equestris
PeSPX-MFS1	XP_020571949	Phalaenopsis equestris
PeSPX-MFS2	XP_020571948	Phalaenopsis equestris
PeSPX-MFS3	XP_020571947	Phalaenopsis equestris
PeSPX-EXS1	XP_020590441	Phalaenopsis equestris
PeSPX-EXS2	XP_020583678	Phalaenopsis equestris
PeSPX-RING1	XP_020580458	Phalaenopsis equestris
PeSPX-RING2	XP_020580459	Phalaenopsis equestris
PeSPX-RING3	XP_020589255	Phalaenopsis equestris
PeSPX-RING4	XP_020589246	Phalaenopsis equestris
OsSPX1	NP_001058013	Oryza sativa
OsSPX2	NP_001046228	Oryza sativa
OsSPX5	NP_001064515	Oryza sativa
OsSPX3	NP_001050332	Oryza sativa
OsSPX6	NP_001175297	Oryza sativa
OsSPX4	NP_001051771	Oryza sativa
OsSPX-MFS1	NP_001056681	Oryza sativa
OsSPX-EXS1	NP_001057682	Oryza sativa
OsSPX-EXS2	NP_001048464	Oryza sativa
OsSPX-MFS2	NP_001053611	Oryza sativa
OsSPX-RING1	NP_001050788	Oryza sativa
OsSPX-RING2	NP_001060606	Oryza sativa
DoSPX1	XP_020685819	Dendrobium officinale
DoSPX3	XP_028552625	Dendrobium officinale
DoSPX4	XP_020672225	Dendrobium officinale
DoSPX-EXS1	XP_020678918	Dendrobium officinale
DoSPX-EXS2	XP_020691959	Dendrobium officinale
DoSPX-MFS	XP_020690961	Dendrobium officinale
DoPHR2	XM_020837237	Dendrobium officinale
DoSPX-RING	XP_020681457	Dendrobium officinale
DoACTIN	XM_020830584	Dendrobium officinale
NtPHR1	XM_009595501	Nicotiana tabacum
NtPHR2	XM_009601378	Nicotiana tabacum
NtPT1	AB020061	Nicotiana tabacum
NtPT2	AB042951	Nicotiana tabacum
NtACTIN	XM_016618072	Nicotiana tabacum
